# Supplementary material
Source: HighWire-hosted journal article supplement (https://srh.bmj.com/content/48/1/54)
Supplement: inline-supplementary-material-2 [file inline-supplementary-material-2.pdf]

Appendix 2. Processes and criteria for post-vasectomy semen analysis recommended by the Association of Surgeons in Primary Care (ASPC) of the United Kingdom.\*

| Number of tests                                                                               | Recommendation | Semen sample submission strategies                                                                                                                                                 |                                                                                                                                                                                                                                     |
|-----------------------------------------------------------------------------------------------|----------------|------------------------------------------------------------------------------------------------------------------------------------------------------------------------------------|-------------------------------------------------------------------------------------------------------------------------------------------------------------------------------------------------------------------------------------|
|                                                                                               |                | Non-Postal <sup>†</sup>                                                                                                                                                            | Postal <sup>‡</sup>                                                                                                                                                                                                                 |
| 2-Test<br><br>Based on 2004 RCOG <sup>1</sup> / 2002 BAS <sup>2</sup> guidelines              | Clearance      | No sperm or less than 10,000 non-motile sperm/mL observed on two consecutive PVSA. <sup>§</sup>                                                                                    | No sperm observed on two consecutive PVSA. <sup>§</sup>                                                                                                                                                                             |
|                                                                                               | Repeat test    | Any motile sperm or more than 10,000 non-motile sperm/mL observed before 7 months post vasectomy.                                                                                  | Any motile or non-motile sperm observed before 7 months post vasectomy.                                                                                                                                                             |
|                                                                                               | Failure        | Failure: Any motile sperm observed after 7 months post vasectomy.<br>Possible failure: More than 10,000 non-motile sperm/mL observed after 7 months post vasectomy. <sup>  </sup>  | Failure: Any motile sperm observed after 7 months post vasectomy.<br>Possible failure: Any concentration of non-motile sperm >7 months post vasectomy. At this point, the patient should submit non-postal sample(s). <sup>  </sup> |
| 1-Test<br><br>Based on 2014 FSRH <sup>3</sup> / 2016 ABA,BAS and BAUS <sup>4</sup> guidelines | Clearance      | No sperm or less than 100,000 non-motile sperm/mL observed in PVSA. <sup>§</sup>                                                                                                   | No sperm observed in PVSA. <sup>§</sup>                                                                                                                                                                                             |
|                                                                                               | Repeat test    | Any motile sperm or more than 100,000 non-motile sperm/mL observed before 7 months post vasectomy.                                                                                 | Any motile or non-motile sperm observed before 7 months post vasectomy.                                                                                                                                                             |
|                                                                                               | Failure        | Failure: Any motile sperm observed after 7 months post vasectomy.<br>Possible failure: More than 100,000 non-motile sperm/mL observed after 7 months post vasectomy. <sup>  </sup> | Failure: Any motile sperm observed after 7 months post-vasectomy.<br>Possible failure: Any concentration of non-motile sperm >7 months post vasectomy. At this point, the patient should submit non-postal sample(s). <sup>  </sup> |

PVSA = post-vasectomy semen analysis

\*These recommendations and criteria are primarily based on the 2004 Royal College of Obstetricians and Gynaecologists (RCOG)<sup>1</sup> and 2014 Faculty of Sexual & Reproductive Healthcare (FSRH)<sup>2</sup> Guidelines. The ASPC also took into account some recommendations of the 2002 British Andrology Society (BAS)<sup>3</sup> and the 2016 Association of Biomedical Andrologists (ABA), BAS, and British Association of Urological Surgeons (BAUS)<sup>4</sup> guidelines.

<sup>†</sup> A fresh sample delivered direct to the laboratory (following set instructions usually requiring booking of an appointment) and examined within 1 or 2 hours of ejaculation according to local laboratory protocol.

<sup>‡</sup>This is a sample taken at home, following set instructions, and sent to a laboratory in specially packaging via the Royal Mail.

<sup>§</sup> The 2004 RCOG guideline recommends that PVSA may commence any time beyond 8 weeks whilst the 2014 guidelines suggests 12 weeks. Most surgeons advise submission of PVSA samples between 12-16 weeks.

<sup>||</sup> If more than the recommended number of non-motile sperm/mL are present at 7 months, a decision should be reached with the patient to determine the future course of action. This may be to re-operate or continue other contraception with or without further PVSA. This shared decision may be informed by frequency of ejaculation and any trend in numbers of sperm seen.

## References

1. Royal College of Obstetricians & Gynaecologists. Male and female sterilisation. National evidence-based clinical guideline number 4. London: RCOG Press, 2004.
2. Royal College of Obstetricians & Gynaecologists. Male and Female Sterilisation (Clinical Effectiveness Unit),. In: Guidance FoSRHC, ed., 2014:76.
3. Hancock P, McLaughlin E. British Andrology Society guidelines for the assessment of post vasectomy semen samples (2002). *J Clin Pathol* 2002;55(11):812-6. doi: 10.1136/jcp.55.11.812 [published Online First: 2002/10/29]
4. Hancock P, Woodward BJ, Muneer A, et al. 2016 Laboratory guidelines for postvasectomy semen analysis: Association of Biomedical Andrologists, the British Andrology Society and the British Association of Urological Surgeons. *J Clin Pathol* 2016;69(7):655-60. doi: 10.1136/jclinpath-2016-203731 [published Online First: 2016/04/17]
